# Supplementary material
Source: PubMed Central journal article supplement (PMC3272104)
Supplement: NIHMS338083-supplement-1_si_001.pdf [file NIHMS338083-supplement-1_si_001.pdf]

**Supplemental Figure 1.** MS/MS spectra of single-peptide proteins listed in Table 1.

**A. Beta-2-microglobulin (B2M)**

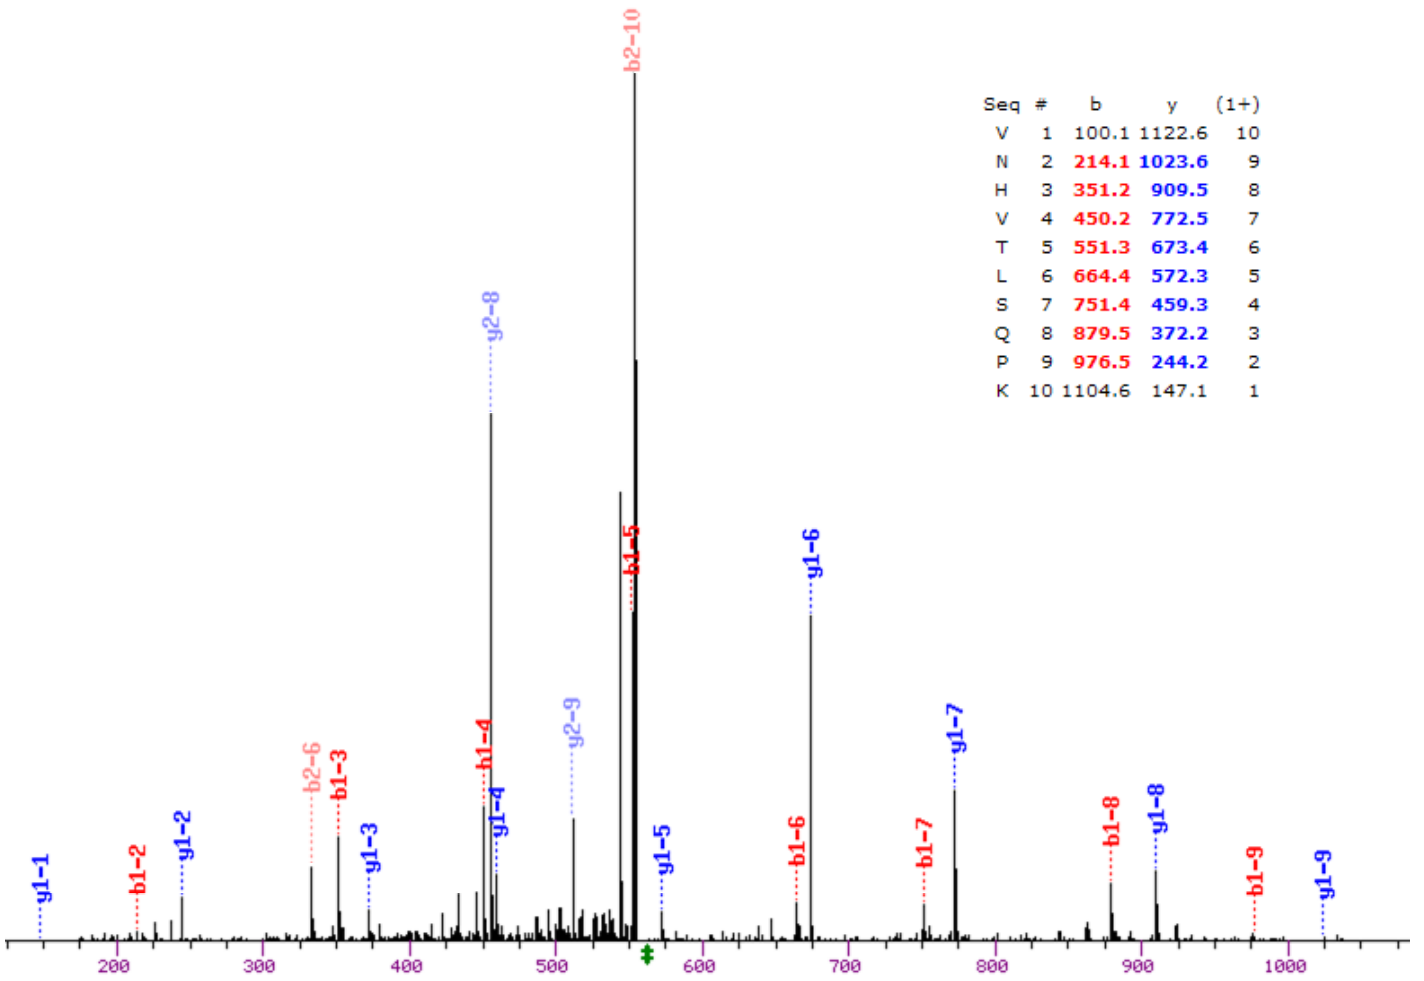

**B. Homeobox protein HMX1**

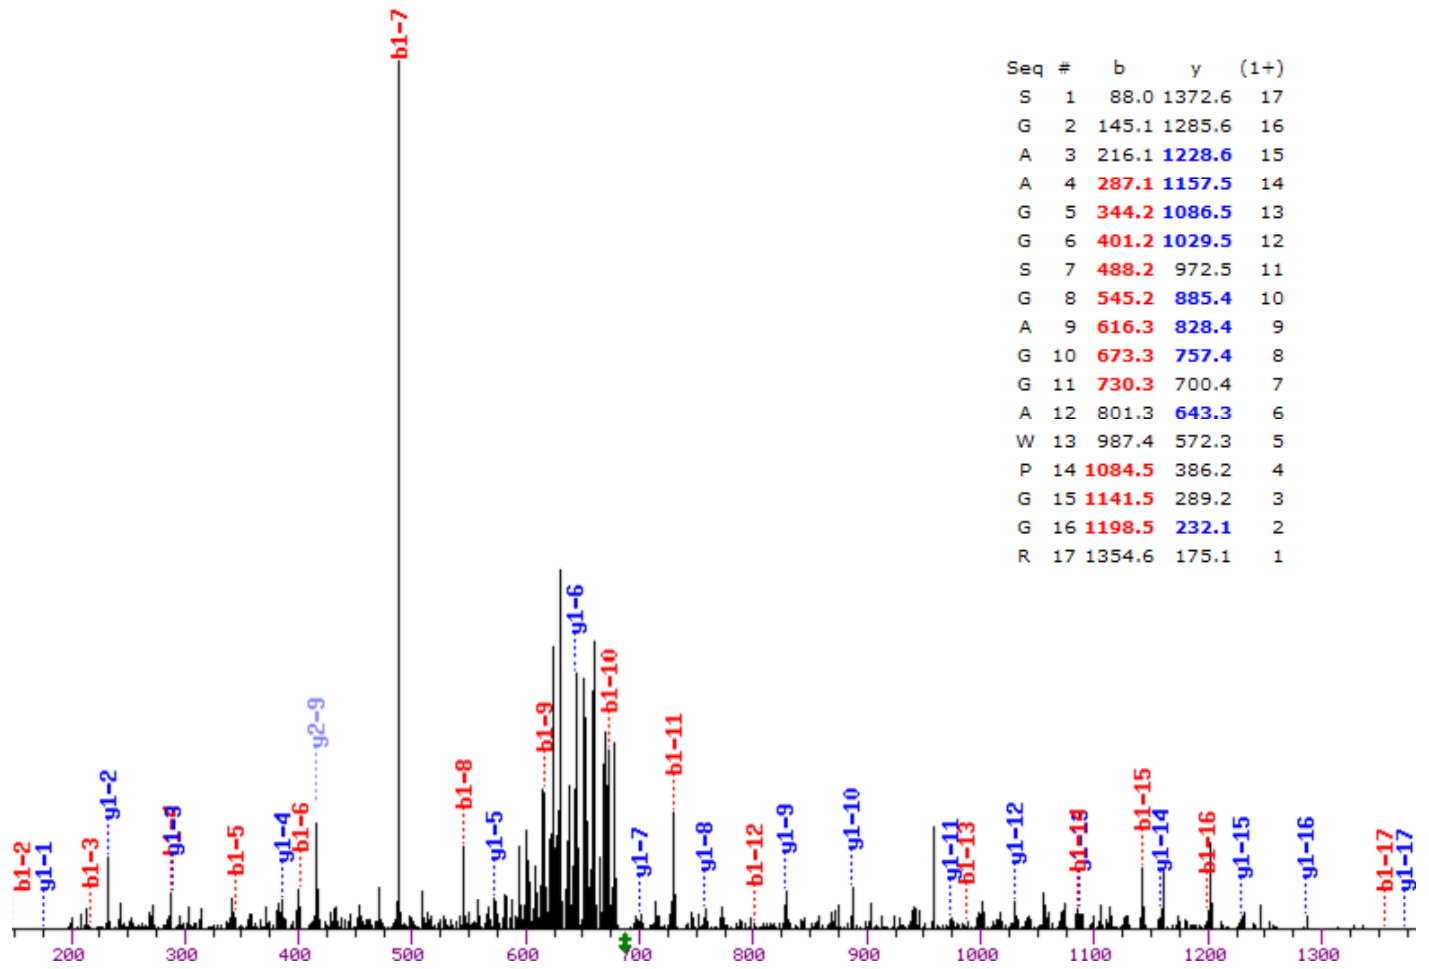

C. Melastatin 1 (TRPM1)

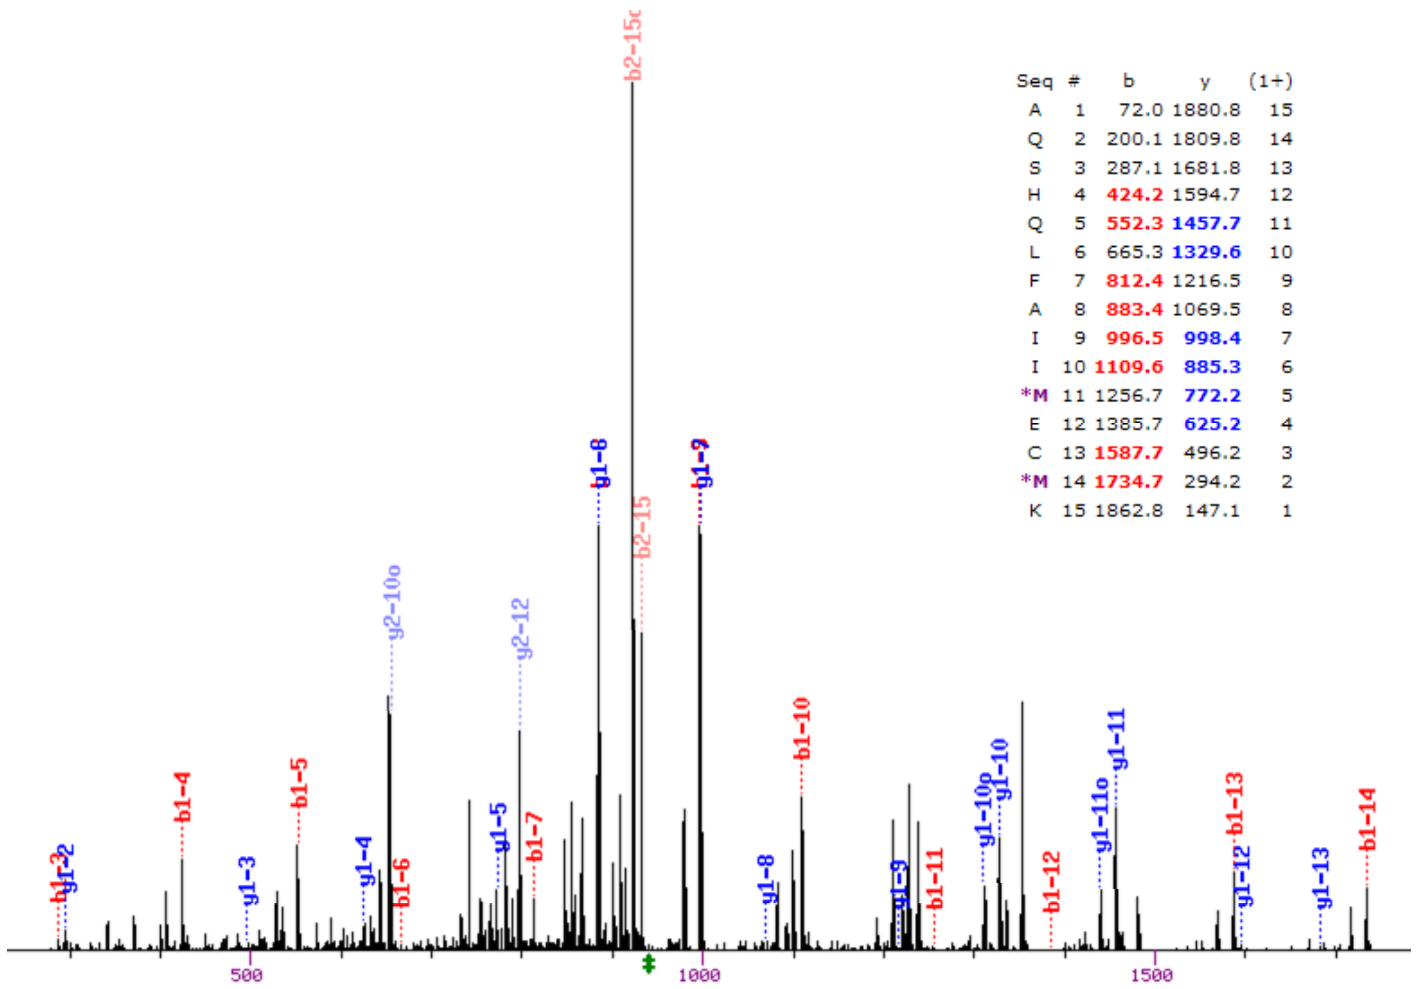

D. Protein CutA

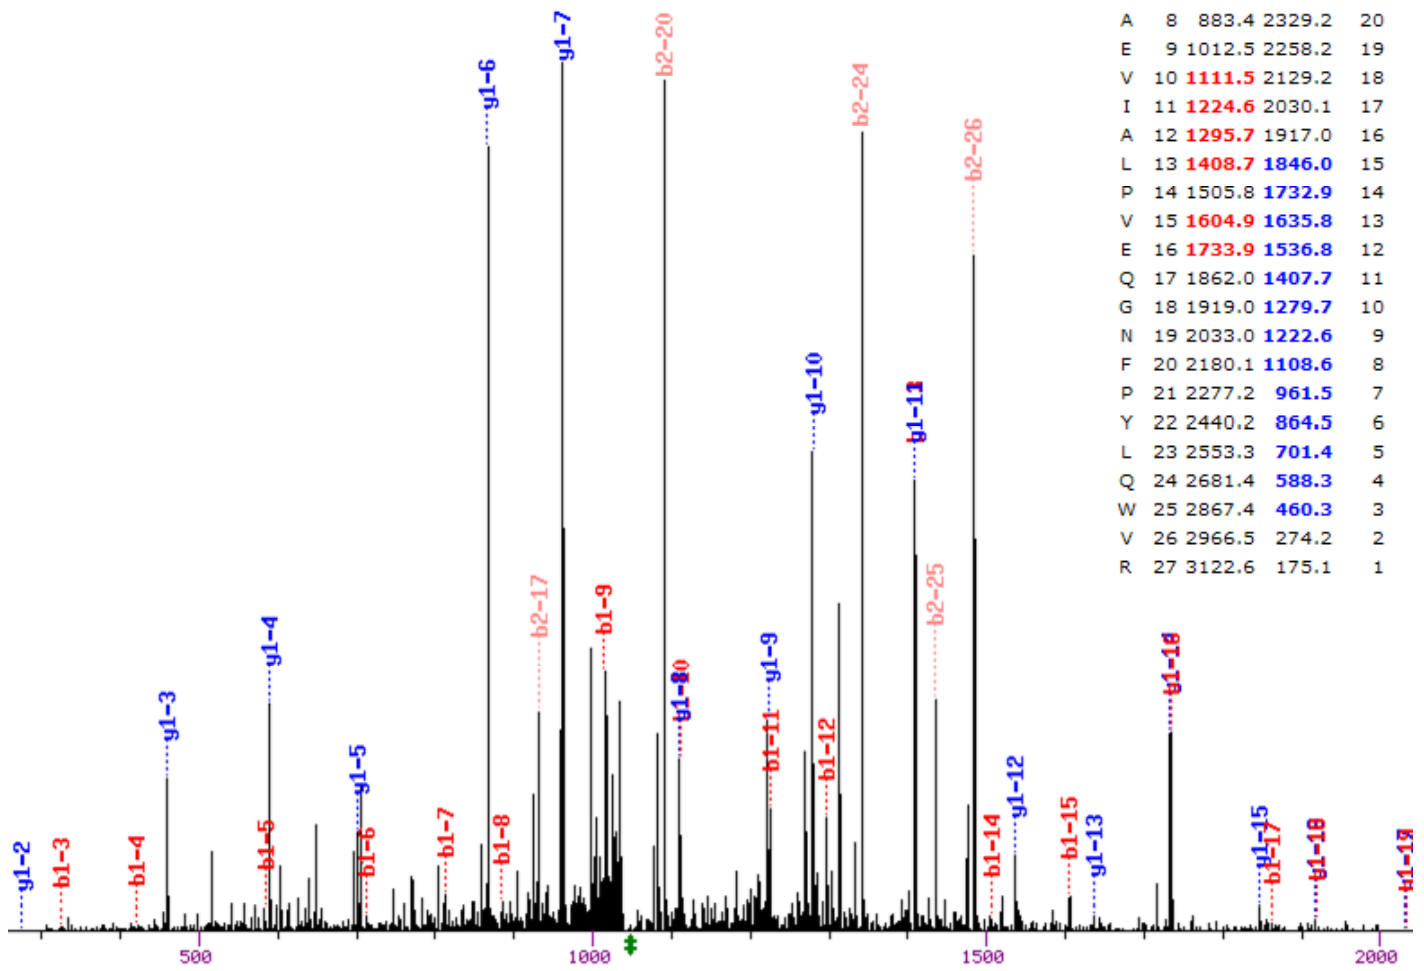

E. SERPINB12 protein

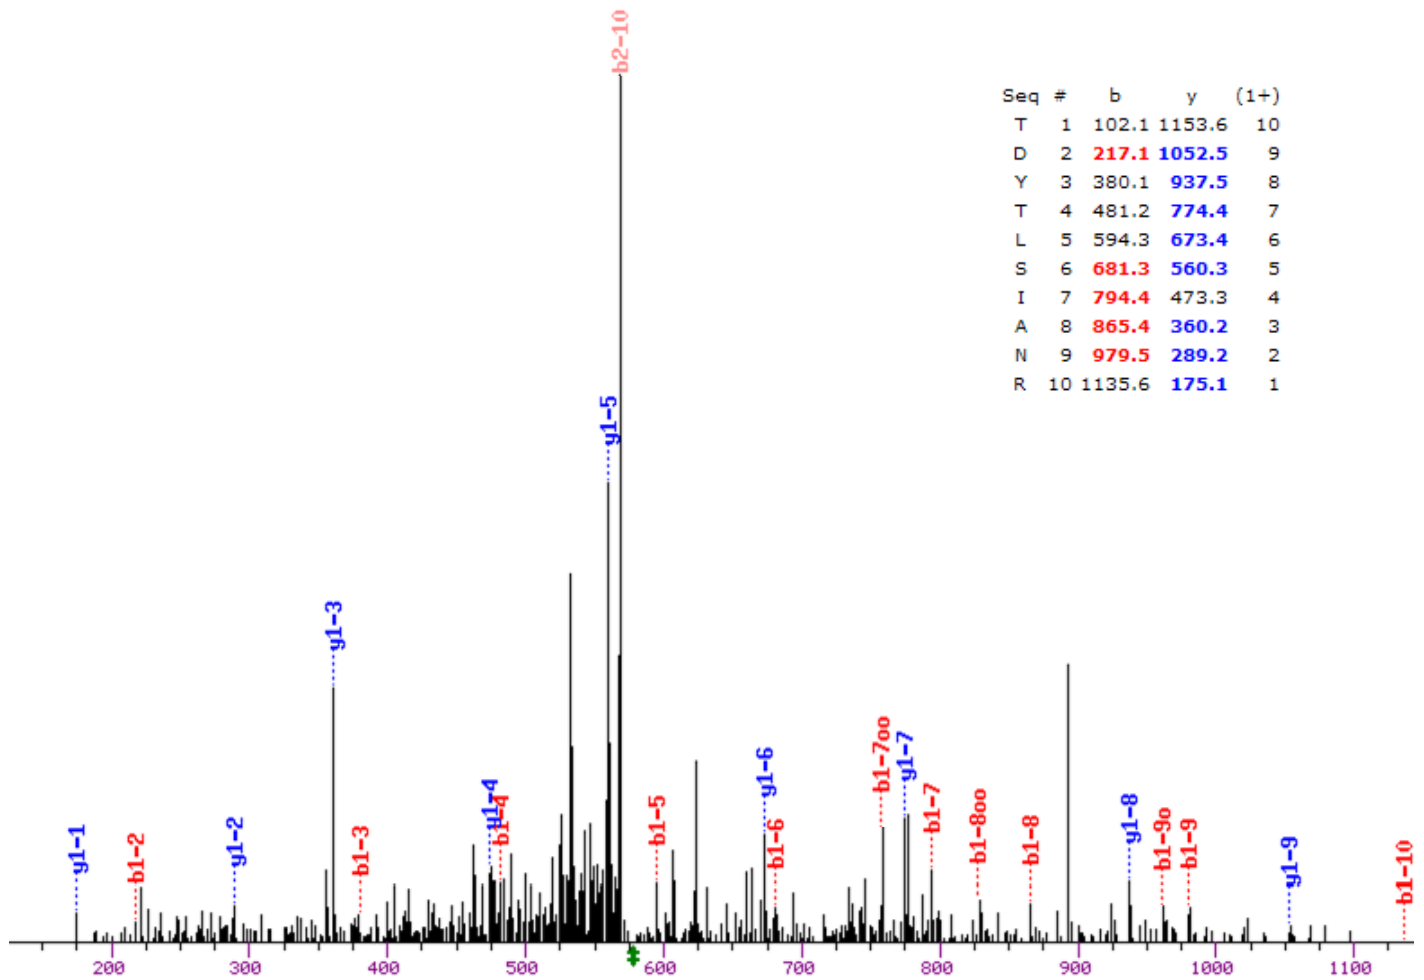

**Supplemental Table 1.** Selected human proteins/peptides shed by ovarian TOV-112D tumors into SCID mouse blood

| No. | Uniprot ID | Name  | Description                                  | Sequence   | Spectrum | Sequence | MolWt  | pI     | ObsM+H+    | ppm                       | z | XCorr  | DeltCN | SpR | Sequence              |
|-----|------------|-------|----------------------------------------------|------------|----------|----------|--------|--------|------------|---------------------------|---|--------|--------|-----|-----------------------|
|     |            |       |                                              | Count      | Count    | Coverage |        |        |            |                           |   |        |        |     |                       |
| 1   | Q14624     | ITIH4 | Inter-alpha-trypsin inhibitor heavy chain H4 | 10         | 2953     | 13.2     | 103358 | 7      | 877.444    | -0.9                      | 2 | 2.5315 | 0.0188 | 12  | K.GSEMVVAGK.L         |
|     |            |       |                                              | 1452.7358  | 2        | 2        | 5.0242 | 0.3996 | 1          | K.NGDIYSLTVDSR.V          |   |        |        |     |                       |
|     |            |       |                                              | 933.543    | 2.8      | 2        | 1.8485 | 0.0218 | 2          | K.NVVFVIDK.S              |   |        |        |     |                       |
|     |            |       |                                              | 1811.959   | 5.1      | 2        | 4.8543 | 0.2937 | 1          | K.SPEQQETVLDGNLIIR.Y      |   |        |        |     |                       |
|     |            |       |                                              | 1256.591   | 2.3      | 2        | 2.4519 | 0.2073 | 1          | K.YIFHNFMER.L             |   |        |        |     |                       |
|     |            |       |                                              | 1722.839   | 1.3      | 2        | 4.4757 | 0.3792 | 1          | R.ANTVQEATFQM*ELPK.K      |   |        |        |     |                       |
|     |            |       |                                              | 1017.5475  | -0.1     | 2        | 3.0339 | 0.3329 | 2          | R.FAHTVVTSR.V             |   |        |        |     |                       |
|     |            |       |                                              | 1204.6698  | 1.1      | 3        | 3.3685 | 0.1134 | 2          | R.FKPTLSQQQK.S            |   |        |        |     |                       |
|     |            |       |                                              | 1144.623   | 1.9      | 2        | 3.7916 | 0.414  | 1          | R.GPDVLTATVSGK.L          |   |        |        |     |                       |
|     |            |       |                                              | 2415.1867  | 3.3      | 3        | 3.4237 | 0.2848 | 1          | R.QGPNLLSDPEQGVEVTGQYER.E |   |        |        |     |                       |
| 2   | P02647     | APOA1 | Apolipoprotein A-I                           | 10         | 3014     | 43.4     | 30778  | 5.8    | 1215.624   | 2                         | 2 | 3.16   | 0.3214 | 1   | K.ATEHLSTLSEK.A       |
|     |            |       |                                              | 1235.69265 | 3.6      | 2        | 3.7731 | 0.3692 | 1          | K.DLATVYVDVLK.D           |   |        |        |     |                       |
|     |            |       |                                              | 1612.789   | 2.3      | 2        | 4.5011 | 0.4187 | 1          | K.LLDNWDVSTVTFK.L         |   |        |        |     |                       |
|     |            |       |                                              | 813.447    | 0.7      | 2        | 2.1938 | 0.0486 | 40         | K.PALEDLR.Q               |   |        |        |     |                       |
|     |            |       |                                              | 1252.62865 | 6.3      | 2        | 2.3686 | 0.2111 | 19         | K.VQPYLDDFQK.K            |   |        |        |     |                       |
|     |            |       |                                              | 1386.7208  | 4.1      | 2        | 4.8366 | 0.4728 | 1          | K.VSFLSALEEYTK.K          |   |        |        |     |                       |
|     |            |       |                                              | 1400.674   | 3.4      | 2        | 4.0743 | 0.4676 | 1          | R.DYVSQFEGSALGK.Q         |   |        |        |     |                       |
|     |            |       |                                              | 1932.939   | 2.7      | 2        | 4.4915 | 0.4571 | 1          | R.EQLGPVTQEFWDNLEK.E      |   |        |        |     |                       |
|     |            |       |                                              | 1230.7147  | 4.5      | 2        | 2.9204 | 0.203  | 1          | R.QGLLPVLESFK.V           |   |        |        |     |                       |
|     |            |       |                                              | 1301.651   | 2        | 2        | 3.1564 | 0.456  | 1          | R.THLAPYSDELK.R           |   |        |        |     |                       |
| 3   | P61769     | B2M   | Beta-2-microglobulin                         | 1          | 9        | 8.4      | 13715  | 6.5    | 1122.6293  | 2.4                       | 2 | 2.8905 | 0.1352 | 1   | R.VNHVTLSPQK.I        |
| 4   | P02766     | TTR   | Transthyretin                                | 4          | 19       | 47.6     | 15887  | 5.7    | 1394.629   | 4.8                       | 2 | 4.1445 | 0.4115 | 1   | K.AADDTWEPFASGK.T     |
|     |            |       |                                              | 2455.15565 | 1.9      | 3        | 6.6073 | 0.5253 | 1          | K.TSESGELHGLTTEEFVEGIYK.V |   |        |        |     |                       |
|     |            |       |                                              | 1366.764   | 3.7      | 2        | 3.8033 | 0.3815 | 1          | R.GSPAINVAVHVFR.K         |   |        |        |     |                       |
|     |            |       |                                              | 2360.24865 | 4.4      | 2        | 5.1587 | 0.4571 | 1          | R.YTIAALLSPYSYSTAVVTNPK.E |   |        |        |     |                       |
| 5   | P02787     | TF    | Transferrin                                  | 5          | 8        | 9.3      | 77050  | 7.1    | 2070.03365 | 2.2                       | 2 | 5.0676 | 0.2878 | 1   | K.EDLIWELLNQAQEHFGK.D |
|     |            |       |                                              | 1629.81865 | 1.7      | 2        | 3.2168 | 0.3047 | 1          | K.EDPQTFYYAVAVVK.K        |   |        |        |     |                       |
|     |            |       |                                              | 1273.648   | -4.3     | 2        | 3.2423 | 0.365  | 1          | K.HSTIFENLANK.A           |   |        |        |     |                       |
|     |            |       |                                              | 1249.607   | 0.9      | 2        | 2.6172 | 0.191  | 6          | K.SASDLTWDNLK.G           |   |        |        |     |                       |
|     |            |       |                                              | 1581.757   | -0.5     | 2        | 3.6935 | 0.2871 | 1          | R.DQYELLCLDNTR.K          |   |        |        |     |                       |
| 6   | P07195     | LDHB  | L-lactate dehydrogenase B chain              | 7          | 256      | 23.7     | 36507  | 6.1    | 957.6145   | 1.4                       | 2 | 2.0985 | 0.0005 | 21  | K.FIIPQIVK.Y          |
|     |            |       |                                              | 913.58453  | 1.8      | 2        | 2.8624 | 0.2956 | 1          | K.IVVVTAGVR.Q             |   |        |        |     |                       |
|     |            |       |                                              | 1694.89365 | -1.3     | 2        | 3.7462 | 0.2966 | 1          | K.LIAPVAEEEEATVPNNK.I     |   |        |        |     |                       |
|     |            |       |                                              | 1176.597   | 6.4      | 2        | 2.8992 | 0.1587 | 1          | K.SADTLWDIQK.D            |   |        |        |     |                       |
|     |            |       |                                              | 1629.869   | 6.7      | 2        | 5.0858 | 0.4016 | 1          | K.SLADELALVDVLEDK.L       |   |        |        |     |                       |
|     |            |       |                                              | 959.558    | 6.2      | 2        | 2.9135 | 0.1164 | 4          | R.GLTSVINQK.L             |   |        |        |     |                       |
|     |            |       |                                              | 1290.652   | 3.8      | 2        | 3.5928 | 0.4448 | 1          | R.VIGSGCNLDSAR.F          |   |        |        |     |                       |
| 7   | P23528     | CFL1  | Cofilin-1                                    | 8          | 70       | 51.5     | 18371  | 8.1    | 1223.6381  | 3.3                       | 2 | 3.2213 | 0.3483 | 1   | K.AVLFCLSEDK.K        |
|     |            |       |                                              | 1351.737   | 5.9      | 2        | 2.5279 | 0.0574 | 6          | K.AVLFCLSEDK.N            |   |        |        |     |                       |
|     |            |       |                                              | 2166.11165 | 7        | 2        | 6.2231 | 0.5645 | 1          | K.EILVGDVGGTQDDPYATFK.M   |   |        |        |     |                       |
|     |            |       |                                              | 1561.73    | -1       | 2        | 4.0859 | 0.0867 | 1          | K.HELQANCYEEVK.D          |   |        |        |     |                       |
|     |            |       |                                              | 1832.8549  | -2.5     | 3        | 4.0433 | 0.2656 | 1          | K.HELQANCYEEVKDR.C        |   |        |        |     |                       |
|     |            |       |                                              | 1990.0759  | 3.8      | 3        | 4.2352 | 0.3407 | 1          | K.KEDLVFVFWAPESAPLK.S     |   |        |        |     |                       |
|     |            |       |                                              | 1130.647   | 4.8      | 2        | 3.9177 | 0.3099 | 1          | K.LGGSAVISLEGK.P          |   |        |        |     |                       |
|     |            |       |                                              | 1337.63465 | 6.5      | 2        | 3.8056 | 0.3303 | 1          | R.YALYDATYETK.E           |   |        |        |     |                       |

Supplemental Table 1 (continued)

| No.        | Uniprot ID | Name      | Description                              | Sequence Count | Spectrum Count | Sequence Coverage           | MolWt  | pI   | ObsM+H+    | ppm  | z | XCorr  | DeltCN | SpR | Sequence                          |
|------------|------------|-----------|------------------------------------------|----------------|----------------|-----------------------------|--------|------|------------|------|---|--------|--------|-----|-----------------------------------|
| 8          | P10909     | CLU       | Clusterin                                | 7              | 34             | 16.7                        | 52495  | 6.3  | 1873.99665 | 3.3  | 2 | 5.3043 | 0.4852 | 1   | K.LFSDSDPTVTVPVEVSR.K             |
|            |            |           |                                          |                |                |                             |        |      | 1117.618   | 7.2  | 2 | 2.7757 | 0.1959 | 1   | K.TLLSNLEEAK.K                    |
|            |            |           |                                          |                |                |                             |        |      | 1245.713   | 6.5  | 2 | 3.1696 | 0.2532 | 1   | K.TLLSNLEEAKK.K                   |
|            |            |           |                                          |                |                |                             |        |      | 1393.7     | 3    | 2 | 4.0304 | 0.37   | 1   | R.ASSIIDELFQDR.F                  |
|            |            |           |                                          |                |                |                             |        |      | 1288.647   | 7.1  | 2 | 3.2366 | 0.2778 | 2   | R.ELDESLOQVAER.L                  |
|            |            |           |                                          |                |                |                             |        |      | 1245.70965 | 3.8  | 2 | 2.8017 | 0.1448 | 3   | R.KTLLSNLEEAK.K                   |
| 2314.18165 | 1.9        | 3         | 2.8497                                   | 0.116          | 15             | R.VTTVASHTSDSQVPSGVTEVVVK.L |        |      |            |      |   |        |        |     |                                   |
| 9          | P05090     | APOD      | Apolipoprotein D                         | 3              | 9              | 20.1                        | 21276  | 5.1  | 1699.822   | 6.6  | 2 | 3.8704 | 0.3679 | 1   | K.CPNPPVQENFDVVK.Y                |
|            |            |           |                                          |                |                |                             |        |      | 1230.67    | 1    | 2 | 3.4477 | 0.2192 | 1   | K.NILTSNNIDVK.K                   |
|            |            |           |                                          |                |                |                             |        |      | 1423.7522  | 6.7  | 2 | 2.9596 | 0.2164 | 11  | R.NPNLPPEVDSLK.N                  |
| 10         | P07339     | CTSD      | Cathepsin D                              | 4              | 75             | 15.5                        | 44552  | 6.5  | 2047.05365 | -3.2 | 2 | 3.7367 | 0.352  | 1   | K.AIGAVPLIQGEYM*IPCEK.V           |
|            |            |           |                                          |                |                |                             |        |      | 1239.62165 | 2.1  | 2 | 3.6871 | 0.3827 | 1   | K.FDGILGMAYPR.I                   |
|            |            |           |                                          |                |                |                             |        |      | 1803.81865 | 6.7  | 2 | 4.647  | 0.073  | 1   | R.DPDAQPGGELM*LGGTDSK.Y           |
|            |            |           |                                          |                |                |                             |        |      | 1959.043   | 3.2  | 2 | 4.5561 | 0.4371 | 1   | R.ISVNNVLPVFDNLMQK.L              |
| 11         | O00299     | CLIC1     | Chloride intracellular channel protein 1 | 5              | 5              | 27.9                        | 26792  | 5.2  | 1975.012   | -4.3 | 2 | 5.106  | 0.0375 | 1   | K.FLDGNETLADCNLLPK.L              |
|            |            |           |                                          |                |                |                             |        |      | 1281.667   | -1.2 | 2 | 3.6909 | 0.3248 | 1   | K.GVTFNVTTVDTK.R                  |
|            |            |           |                                          |                |                |                             |        |      | 1844.98    | 2.6  | 2 | 4.3598 | 0.5206 | 1   | K.LAALNPESNTAGLDIFAK.F            |
|            |            |           |                                          |                |                |                             |        |      | 1328.6461  | 1.5  | 2 | 2.811  | 0.2444 | 2   | K.NSNPALNDNLEK.G                  |
|            |            |           |                                          |                |                |                             |        |      | 1065.617   | 0.5  | 2 | 2.4933 | 0.0695 | 1   | R.LFM*VLWLK.G                     |
| 12         | P15121     | AKR1B1    | Aldose reductase                         | 4              | 13             | 21                          | 35722  | 7    | 3262.67605 | 0.6  | 3 | 3.2635 | 0.3584 | 1   | K.GIVVTAYSPGSDRPPWAKPEDPSLLEDPR.I |
|            |            |           |                                          |                |                |                             |        |      | 1131.624   | 0.8  | 2 | 2.571  | 0.0728 | 5   | K.M*PILGLTWK.S                    |
|            |            |           |                                          |                |                |                             |        |      | 901.5472   | 0.7  | 2 | 2.6268 | 0.0717 | 9   | K.TTAQVLIR.F                      |
|            |            |           |                                          |                |                |                             |        |      | 2260.14765 | 2    | 2 | 5.4565 | 0.4768 | 1   | K.YKPAVNQIECHPYLTQEK.L            |
| 13         | Q9NP08     | HMX1      | Homeobox protein HMX1                    | 1              | 1              | 4.6                         | 39225  | 11.6 | 1372.62865 | -4.8 | 2 | 3.0886 | 0.0265 | 3   | R.SGAAGSGGAGAWPGGR.H              |
| 14         | Q7Z4N2     | TRPM1     | Melastatin 1                             | 1              | 1              | 1                           | 174417 | 6.9  | 1880.9133  | 3.5  | 2 | 3.4248 | 0.0074 | 25  | K.AQSHQLFAIM*ECM*K.K              |
| 15         | O60888     | CUTA      | Protein CutA                             | 1              | 1              | 15.1                        | 19116  | 5.5  | 3140.62965 | 3    | 3 | 6.4221 | 0.4185 | 1   | R.SVHPYEVAEIALPVEQGNFPYLQWVR.Q    |
| 16         | Q3SYB4     | SERPINB12 | SERPINB12 protein                        | 1              | 1              | 2.4                         | 48446  | 5.4  | 1153.58365 | -1   | 2 | 2.3854 | 0.213  | 10  | K.TDYTLSIANR.L                    |

Note: Human-specific peptides are indicated in red.

Supplemental Table 2. Normalized MRM peak area for peptides and proteins (average) in individual samples.

| Sample Classification | Histotype <sup>1</sup> | Sample Code | Type_Model | CLIC1                        |                                |                                      |         | PRDX6                      |                              |                            |         | CTSD-30 kDa               |                            |         |
|-----------------------|------------------------|-------------|------------|------------------------------|--------------------------------|--------------------------------------|---------|----------------------------|------------------------------|----------------------------|---------|---------------------------|----------------------------|---------|
|                       |                        |             |            | GVTFNVTVDTK<br>(641.3/877.5) | NSNPALNDNLEK<br>(664.8/1013.5) | LAALNPESNTAGLDIFAK<br>(923.0/1136.6) | Average | VVVFVFGPK<br>(504.3/809.4) | LSILYPATTGR<br>(596.3/765.4) | LFPPIIDDR<br>(543.3/728.4) | Average | QVFGKATK<br>(440.2/652.2) | VGFAEAAAR<br>(410.7/721.4) | Average |
| Stage 3               | MC                     | T_455       | Cancer     | 0.779                        | 0.760                          | 0.701                                | 0.747   | 0.466                      | 0.841                        | 0.769                      | 0.692   | 1.998                     | 2.135                      | 2.066   |
| Stage 4               | SP                     | T_474       | Cancer     | 1.839                        | 1.638                          | 1.864                                | 1.780   | 0.645                      | 1.281                        | 1.147                      | 1.024   | 2.631                     | 2.541                      | 2.586   |
| Stage 3               | EN                     | T_475       | Cancer     | 0.877                        | 0.753                          | 0.799                                | 0.810   | 0.361                      | 0.738                        | 0.622                      | 0.574   | 0.409                     | 0.447                      | 0.428   |
| Stage 3               | MU                     | T_476       | Cancer     | 1.420                        | 1.195                          | 0.955                                | 1.190   | 0.596                      | 0.856                        | 0.904                      | 0.785   | 0.673                     | 0.700                      | 0.686   |
| Stage 3               | SP                     | T_478       | Cancer     | 0.605                        | 0.348                          | 0.561                                | 0.505   | 0.915                      | 0.410                        | 0.523                      | 0.616   | 1.044                     | 0.799                      | 0.921   |
| Stage 4               | SP                     | T_482       | Cancer     | 2.597                        | 2.206                          | 2.158                                | 2.320   | 0.797                      | 1.248                        | 1.228                      | 1.091   | 1.618                     | 1.469                      | 1.544   |
| Stage 3               | SP                     | T_536       | Cancer     | 1.612                        | 1.751                          | 1.438                                | 1.600   | 7.542                      | 3.226                        | 3.955                      | 4.908   | 0.954                     | 0.694                      | 0.824   |
| Stage 3               | SP                     | T_539       | Cancer     | 0.998                        | 0.960                          | 0.982                                | 0.980   | 0.719                      | 0.393                        | 0.441                      | 0.518   | 1.251                     | 1.493                      | 1.372   |
| Stage 3               | SP                     | T_541       | Cancer     | 0.062                        | 0.066                          | 0.060                                | 0.063   | 0.056                      | 0.352                        | 0.061                      | 0.156   | 0.506                     | 0.641                      | 0.573   |
| Stage 3               | SP                     | T_543       | Cancer     | 0.430                        | 0.210                          | 0.368                                | 0.336   | 0.221                      | 0.507                        | 0.362                      | 0.364   | 0.194                     | 0.303                      | 0.249   |
| Stage 3               | SP                     | T_553       | Cancer     | 1.558                        | 1.610                          | 2.081                                | 1.749   | 2.256                      | 2.540                        | 3.352                      | 2.716   | 1.218                     | 1.420                      | 1.319   |
| Stage 3               | SP                     | T_556       | Cancer     | 1.762                        | 3.158                          | 1.920                                | 2.280   | 1.696                      | 2.254                        | 2.366                      | 2.105   | 1.429                     | 1.246                      | 1.338   |
| Stage 4               | UN                     | T_557       | Cancer     | 1.540                        | 1.542                          | 1.612                                | 1.565   | 0.403                      | 0.728                        | 0.653                      | 0.594   | 1.831                     | 1.817                      | 1.824   |
| Stage 3               | UN                     | T_577       | Cancer     | 0.288                        | 0.394                          | 0.528                                | 0.404   | 0.381                      | 0.956                        | 0.422                      | 0.586   | 0.672                     | 0.631                      | 0.651   |
| Stage 3               | AD                     | T_600       | Cancer     | 0.770                        | 0.775                          | 1.090                                | 0.878   | 0.325                      | 0.512                        | 0.369                      | 0.402   | 0.720                     | 0.594                      | 0.657   |
| Stage 3               | UN                     | T_602       | Cancer     | 0.215                        | 0.234                          | 0.141                                | 0.197   | 0.147                      | 0.410                        | 0.243                      | 0.267   | 0.079                     | 0.219                      | 0.149   |
| Stage 3               | MU                     | T_603       | Cancer     | 0.455                        | 0.305                          | 0.448                                | 0.403   | 0.301                      | 0.501                        | 0.383                      | 0.395   | 0.444                     | 0.410                      | 0.427   |
| Stage 3               | SP                     | T_604       | Cancer     | 0.192                        | 0.094                          | 0.294                                | 0.193   | 0.174                      | 0.246                        | 0.200                      | 0.207   | 0.330                     | 0.442                      | 0.386   |
| Benign                |                        | T_B-23      | Normal     | 0.234                        | 0.263                          | 0.127                                | 0.208   | 0.227                      | 0.331                        | 0.213                      | 0.257   | 0.355                     | 0.351                      | 0.353   |
| Benign                |                        | T_B-25      | Normal     | 0.168                        | 0.150                          | 0.147                                | 0.155   | 0.133                      | 0.419                        | 0.303                      | 0.285   | 0.371                     | 0.493                      | 0.432   |
| Benign                |                        | T_B-70      | Normal     | 0.476                        | 0.068                          | 0.341                                | 0.295   | 0.406                      | 0.521                        | 0.623                      | 0.517   | 0.163                     | 0.081                      | 0.122   |
| Benign                |                        | T_B-77      | Normal     | 0.685                        | 0.164                          | 0.609                                | 0.486   | 0.359                      | 0.850                        | 0.586                      | 0.598   | 0.110                     | 0.131                      | 0.120   |
| Benign                |                        | T_B-79      | Normal     | 0.417                        | 0.213                          | 0.435                                | 0.355   | 0.203                      | 0.429                        | 0.262                      | 0.298   | 0.234                     | 0.344                      | 0.289   |
| Benign                |                        | T_B-80      | Normal     | 1.218                        | 0.204                          | 1.091                                | 0.837   | 0.328                      | 0.378                        | 0.498                      | 0.401   | 0.335                     | 0.362                      | 0.349   |
| Benign                |                        | T_B-81      | Normal     | 0.188                        | 0.126                          | 0.154                                | 0.156   | 0.117                      | 0.121                        | 0.106                      | 0.114   | 0.305                     | 0.248                      | 0.276   |
| Benign                |                        | T_B-82      | Normal     | 0.635                        | 0.832                          | 1.579                                | 1.015   | 1.416                      | 2.048                        | 2.160                      | 1.875   | 0.143                     | 0.207                      | 0.175   |
| Benign                |                        | T_B-83      | Normal     | 0.400                        | 0.380                          | 0.475                                | 0.418   | 0.593                      | 0.945                        | 1.021                      | 0.853   | 0.129                     | 0.297                      | 0.213   |
| Normal                |                        | WCS-02      | Normal     | 0.057                        | 0.043                          | 0.161                                | 0.087   | 0.120                      | 0.436                        | 0.142                      | 0.233   | 0.679                     | 0.600                      | 0.639   |
| Normal                |                        | WCS-04      | Normal     | 0.297                        | 0.110                          | 0.341                                | 0.250   | 0.070                      | 0.265                        | 0.055                      | 0.130   | 0.382                     | 0.359                      | 0.370   |
| Normal                |                        | WCS-12      | Normal     | 0.082                        | 0.076                          | 0.053                                | 0.070   | 0.050                      | 0.185                        | 0.055                      | 0.097   | 0.849                     | 0.645                      | 0.747   |
| Normal                |                        | WCS-13      | Normal     | 0.062                        | 0.034                          | 0.060                                | 0.052   | 0.021                      | 0.236                        | 0.044                      | 0.101   | 0.402                     | 0.337                      | 0.369   |
| Normal                |                        | WCS-14      | Normal     | 0.203                        | 0.090                          | 0.174                                | 0.156   | 0.262                      | 0.720                        | 0.557                      | 0.513   | 0.234                     | 0.175                      | 0.204   |
| Normal                |                        | WCS-15      | Normal     | 0.113                        | 0.162                          | 0.261                                | 0.179   | 0.165                      | 0.321                        | 0.184                      | 0.223   | 0.708                     | 0.744                      | 0.726   |

<sup>1</sup> MC, Mucinous; SP, Serous papillary; EN, Endometrioid; MU, Mullerian; UN, Undifferentiated; AD, Serous papillary adenocarcinoma



**Supplemental Table 3.** Sensitivity, Specificity, and Positive and Negative Predicted Values for Tumor vs. Normal and Benign<sup>a</sup>

| <b>Biomarker</b> | <b>Cut-point<sup>b</sup></b> | <b>Sensitivity</b> | <b>Specificity</b> | <b>Positive Predictive Value</b> | <b>Negative Predictive Value</b> |
|------------------|------------------------------|--------------------|--------------------|----------------------------------|----------------------------------|
| CTSD-30 kDa      | 0.378                        | 88.9               | 73.3               | 80.0                             | 84.6                             |
| CLIC1            | 0.495                        | 66.7               | 86.7               | 85.7                             | 68.4                             |
| PRDX6            | 0.517                        | 66.7               | 80.0               | 80.0                             | 66.7                             |

<sup>a</sup>Cases are 18 tumor samples and 15 normal/benign samples.

<sup>b</sup>Optimal cut-points expressed as normalized relative abundance and defined by maximizing sensitivity and specificity.
